# Supplementary material
Source: PubMed Central journal article supplement (PMC3753971)
Supplement: AEM.01419-13_zam999104633so1.pdf [file AEM.01419-13_zam999104633so1.pdf]

1 Supplement Figure 1. Dendrogram showing genotypic similarity among *Salmonella*  
 2 isolated from conventional and ABF systems at various stages of production

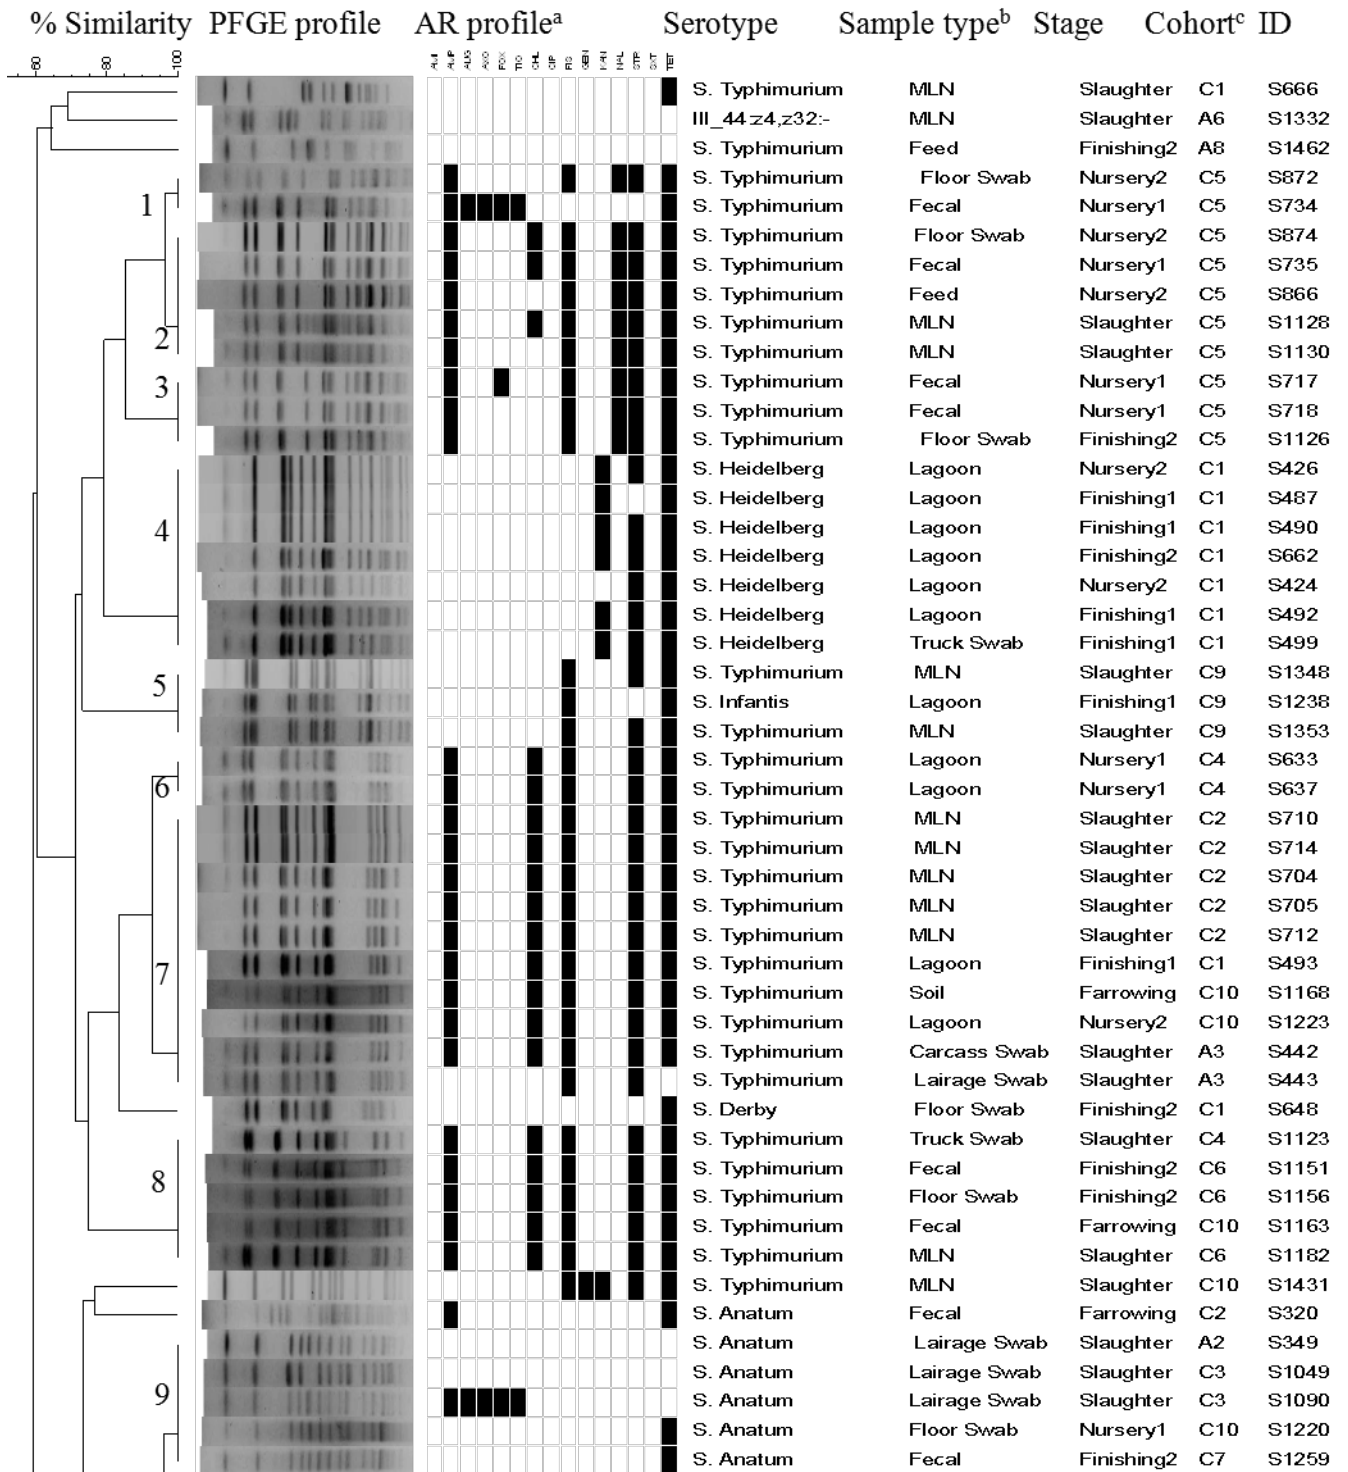

3

4

5  
6  
7  
8

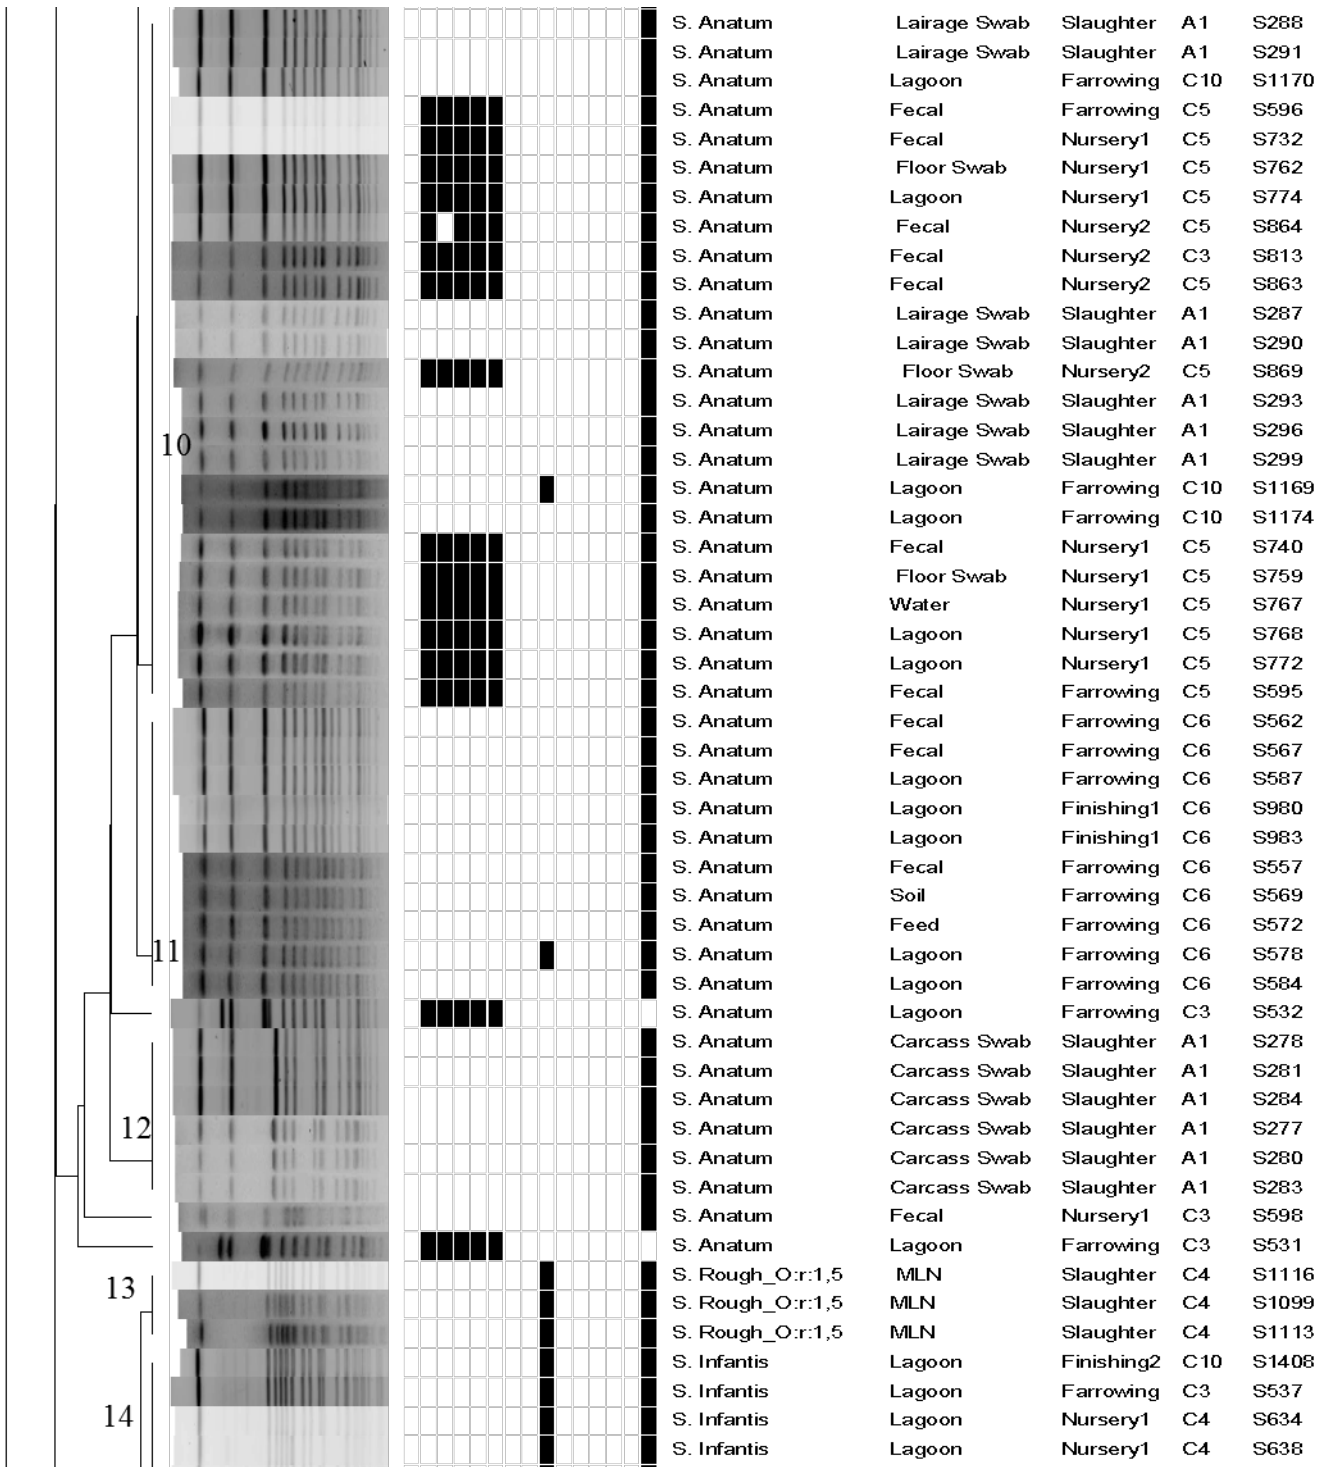

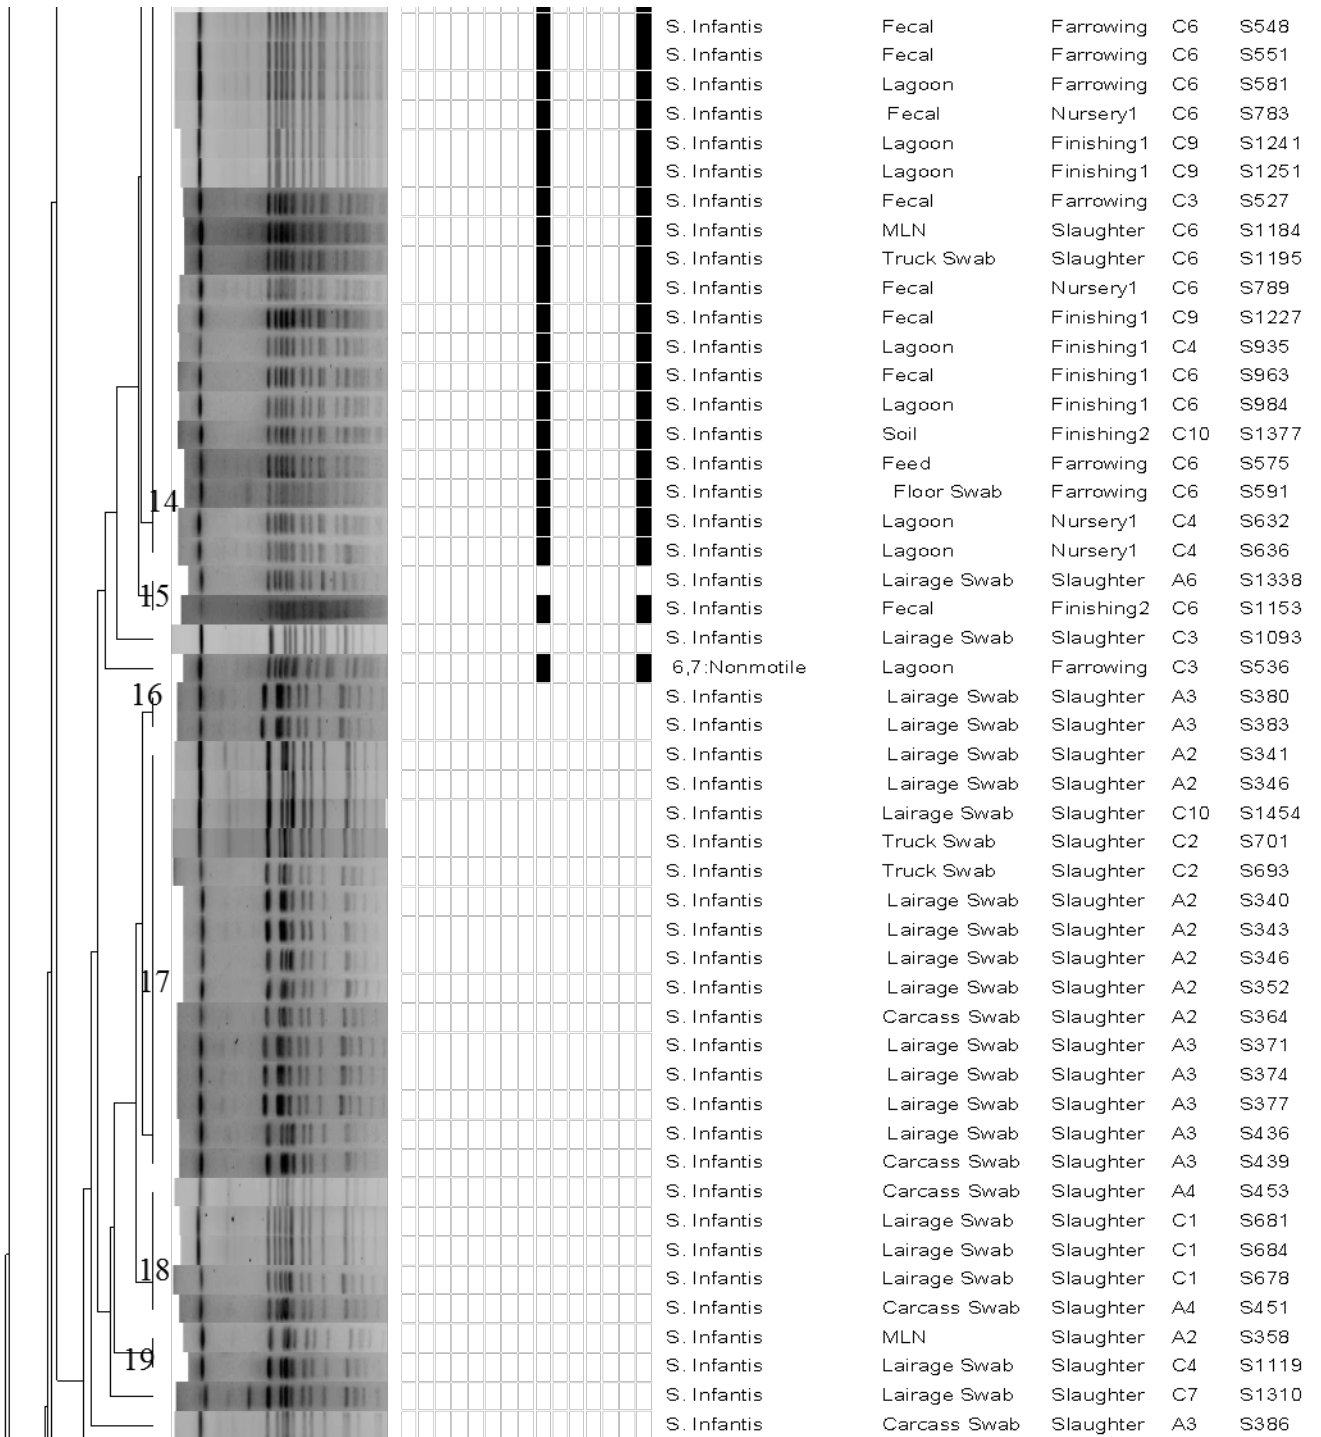

9

10

11

12

13

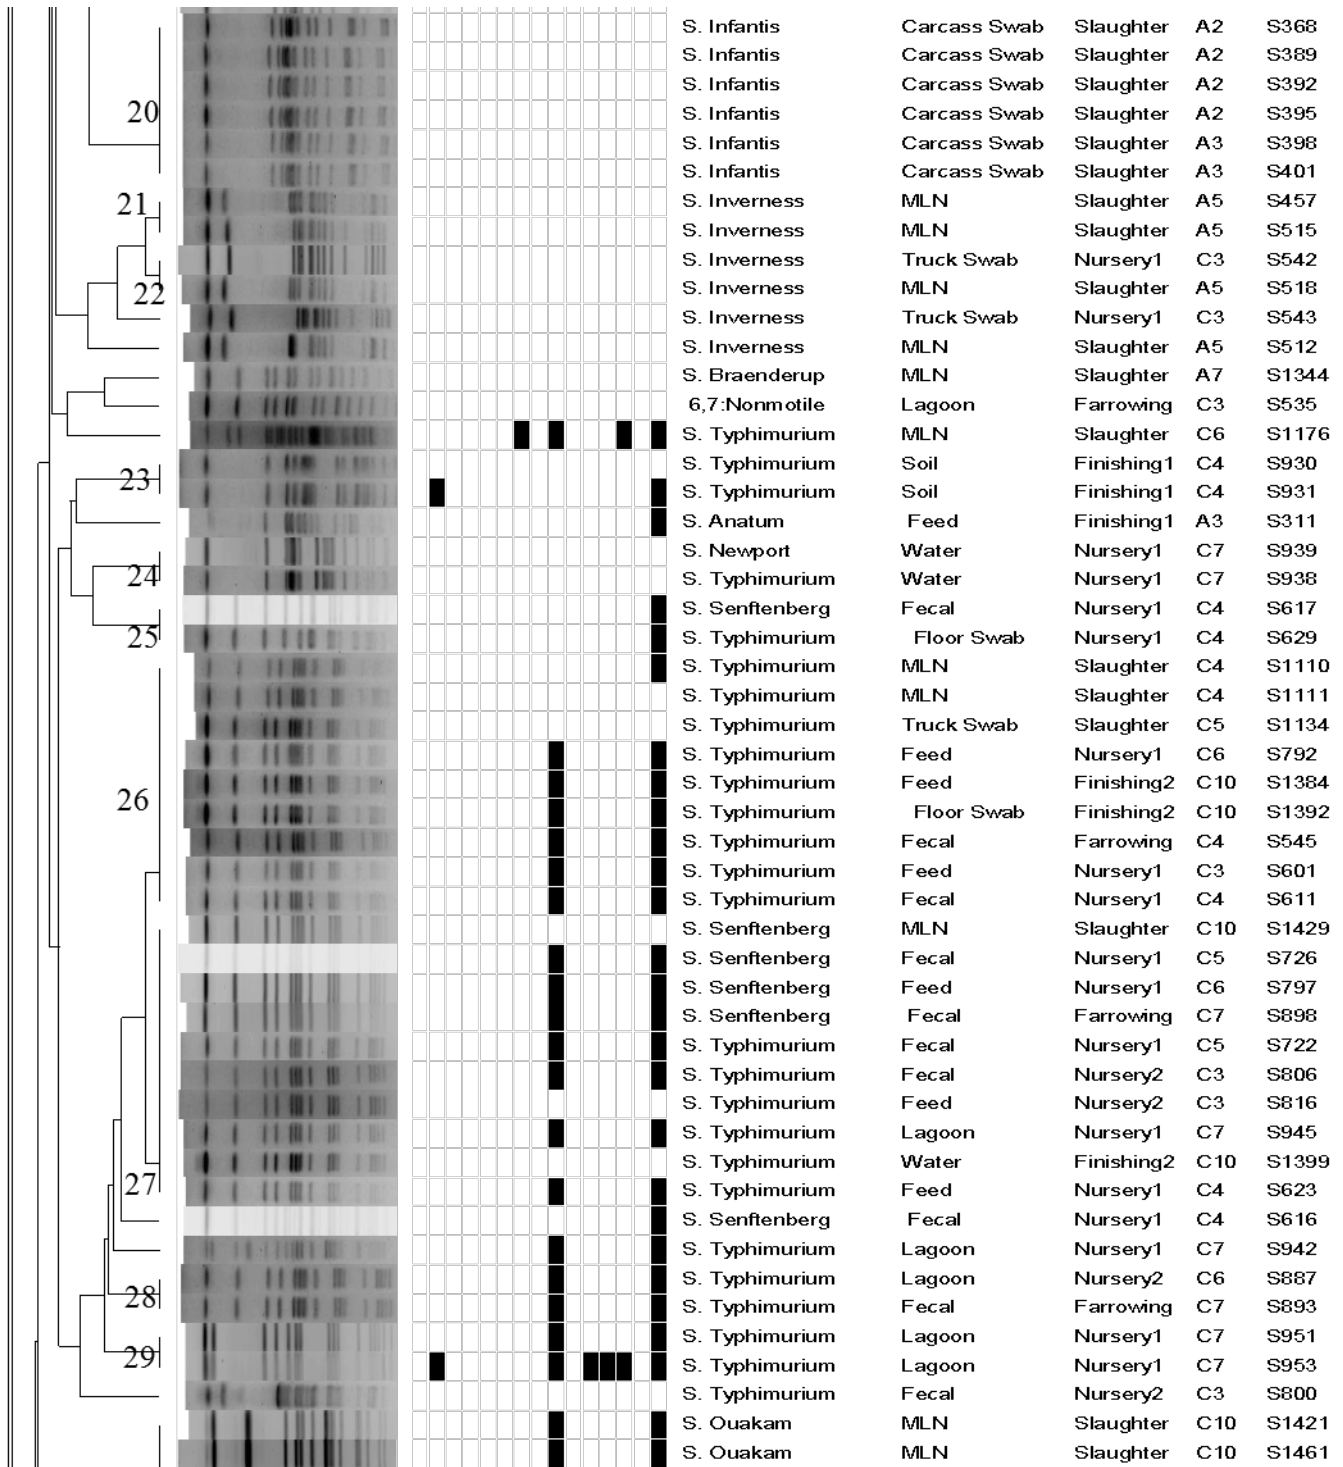

14

15

16

17

18  
19  
20  
21  
22  
23  
24  
25  
26  
27  
28  
29  
30  
31  
32  
33  
34  
35  
36  
37  
38  
39  
40

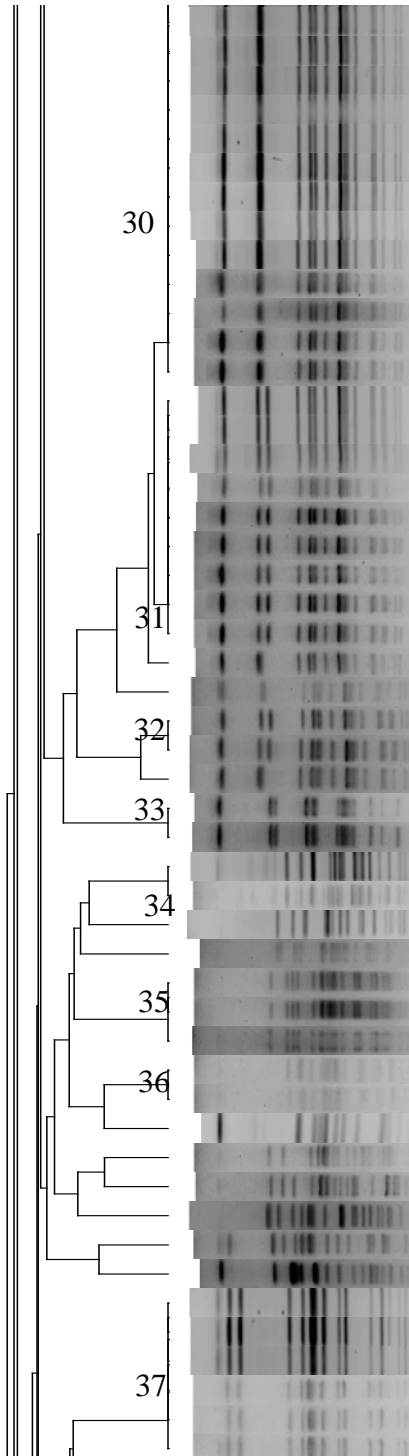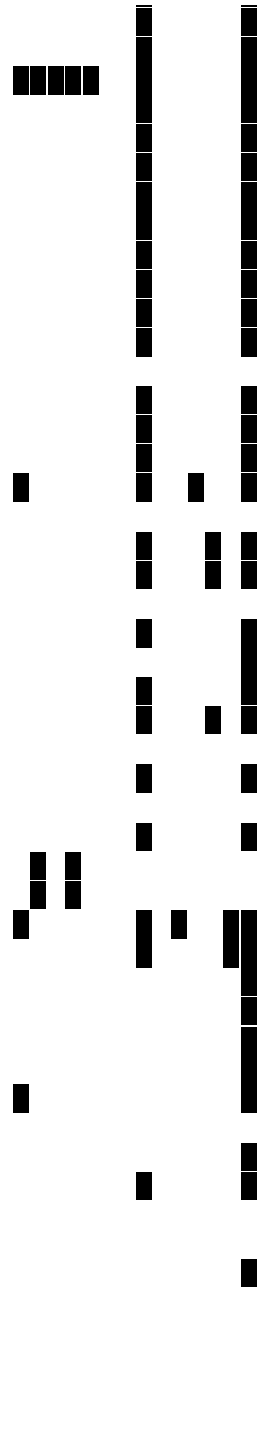

|                      |              |            |     |       |
|----------------------|--------------|------------|-----|-------|
| S. Ouakam            | Feed         | Nursery1   | C5  | S749  |
| S. Ouakam            | Lagoon       | Nursery1   | C5  | S769  |
| S. Ouakam            | Lagoon       | Nursery1   | C5  | S770  |
| S. Ouakam            | Lagoon       | Nursery1   | C5  | S779  |
| S. Ouakam            | Lagoon       | Nursery1   | C5  | S781  |
| S. Ouakam            | Lagoon       | Nursery2   | C5  | S883  |
| S. Ouakam            | Lagoon       | Nursery2   | C5  | S885  |
| S. Ouakam            | Fecal        | Nursery1   | C6  | S786  |
| S. Ouakam            | Lagoon       | Nursery1   | C7  | S943  |
| S. Ouakam            | Lagoon       | Nursery1   | C5  | S780  |
| S. Ouakam            | Lagoon       | Finishing1 | C7  | S1211 |
| S. Ouakam            | MLN          | Slaughter  | C10 | S1411 |
| S. Ouakam            | MLN          | Slaughter  | C10 | S1425 |
| S. Ouakam            | Floor Swab   | Finishing2 | C10 | S1396 |
| S. Ouakam            | Lagoon       | Finishing2 | C10 | S1405 |
| S. Ouakam            | Feed         | Nursery1   | C5  | S745  |
| S. Ouakam            | Feed         | Nursery1   | C5  | S746  |
| S. Ouakam            | Fecal        | Finishing2 | C10 | S1368 |
| S. Ouakam            | Fecal        | Finishing2 | C10 | S1371 |
| S. Ouakam            | Fecal        | Finishing2 | C10 | S1395 |
| S. Ouakam            | Floor Swab   | Finishing2 | C10 | S1397 |
| S. Ouakam            | Lagoon       | Finishing2 | C10 | S1400 |
| S. Schwarzengrund    | Feed         | Finishing1 | C6  | S967  |
| S. Ouakam            | Lagoon       | Nursery2   | C5  | S878  |
| S. Ouakam            | Fecal        | Farrowing  | C7  | S891  |
| S. Ouakam            | Fecal        | Farrowing  | C7  | S911  |
| S. Ouakam            | Floor Swab   | Farrowing  | C7  | S914  |
| S. Ohio              | Feed         | Finishing1 | C9  | S1228 |
| S. Typhimurium       | Water        | Finishing2 | C9  | S1323 |
| S. Typhimurium var C | Feed         | Finishing2 | A1  | S270  |
| S. Typhimurium       | Feed         | Finishing2 | A1  | S271  |
| S. Heidelberg        | Lagoon       | Nursery1   | C3  | S607  |
| S. Typhimurium       | Lagoon       | Finishing1 | C1  | S481  |
| S. Anatum            | Feed         | Finishing1 | C7  | S1199 |
| S. Anatum            | Floor Swab   | Finishing1 | C7  | S1202 |
| S. Johannesburg      | Carcass Swab | Slaughter  | C7  | S1298 |
| S. Heidelberg        | Feed         | Nursery2   | C2  | S429  |
| S. Derby             | Feed         | Nursery2   | C2  | S430  |
| S. Infantis          | Carcass Swab | Slaughter  | C10 | S1448 |
| S. Anatum            | Fecal        | Farrowing  | C2  | S319  |
| S. Ouakam            | Floor Swab   | Finishing1 | C6  | S970  |
| S. Typhimurium       | Feed         | Nursery2   | C4  | S860  |
| S. Muenchen          | MLN          | Slaughter  | A2  | S361  |
| S. Typhimurium       | Truck Swab   | Finishing1 | C1  | S496  |
| S. Give              | Fecal        | Nursery1   | A5  | S258  |
| S. Give              | Water        | Nursery1   | A5  | S263  |
| S. Give              | Water        | Nursery1   | A5  | S266  |
| S. Give              | Fecal        | Nursery1   | A5  | S257  |
| S. Give              | Water        | Nursery1   | A5  | S262  |
| S. Give              | Water        | Nursery1   | A5  | S265  |

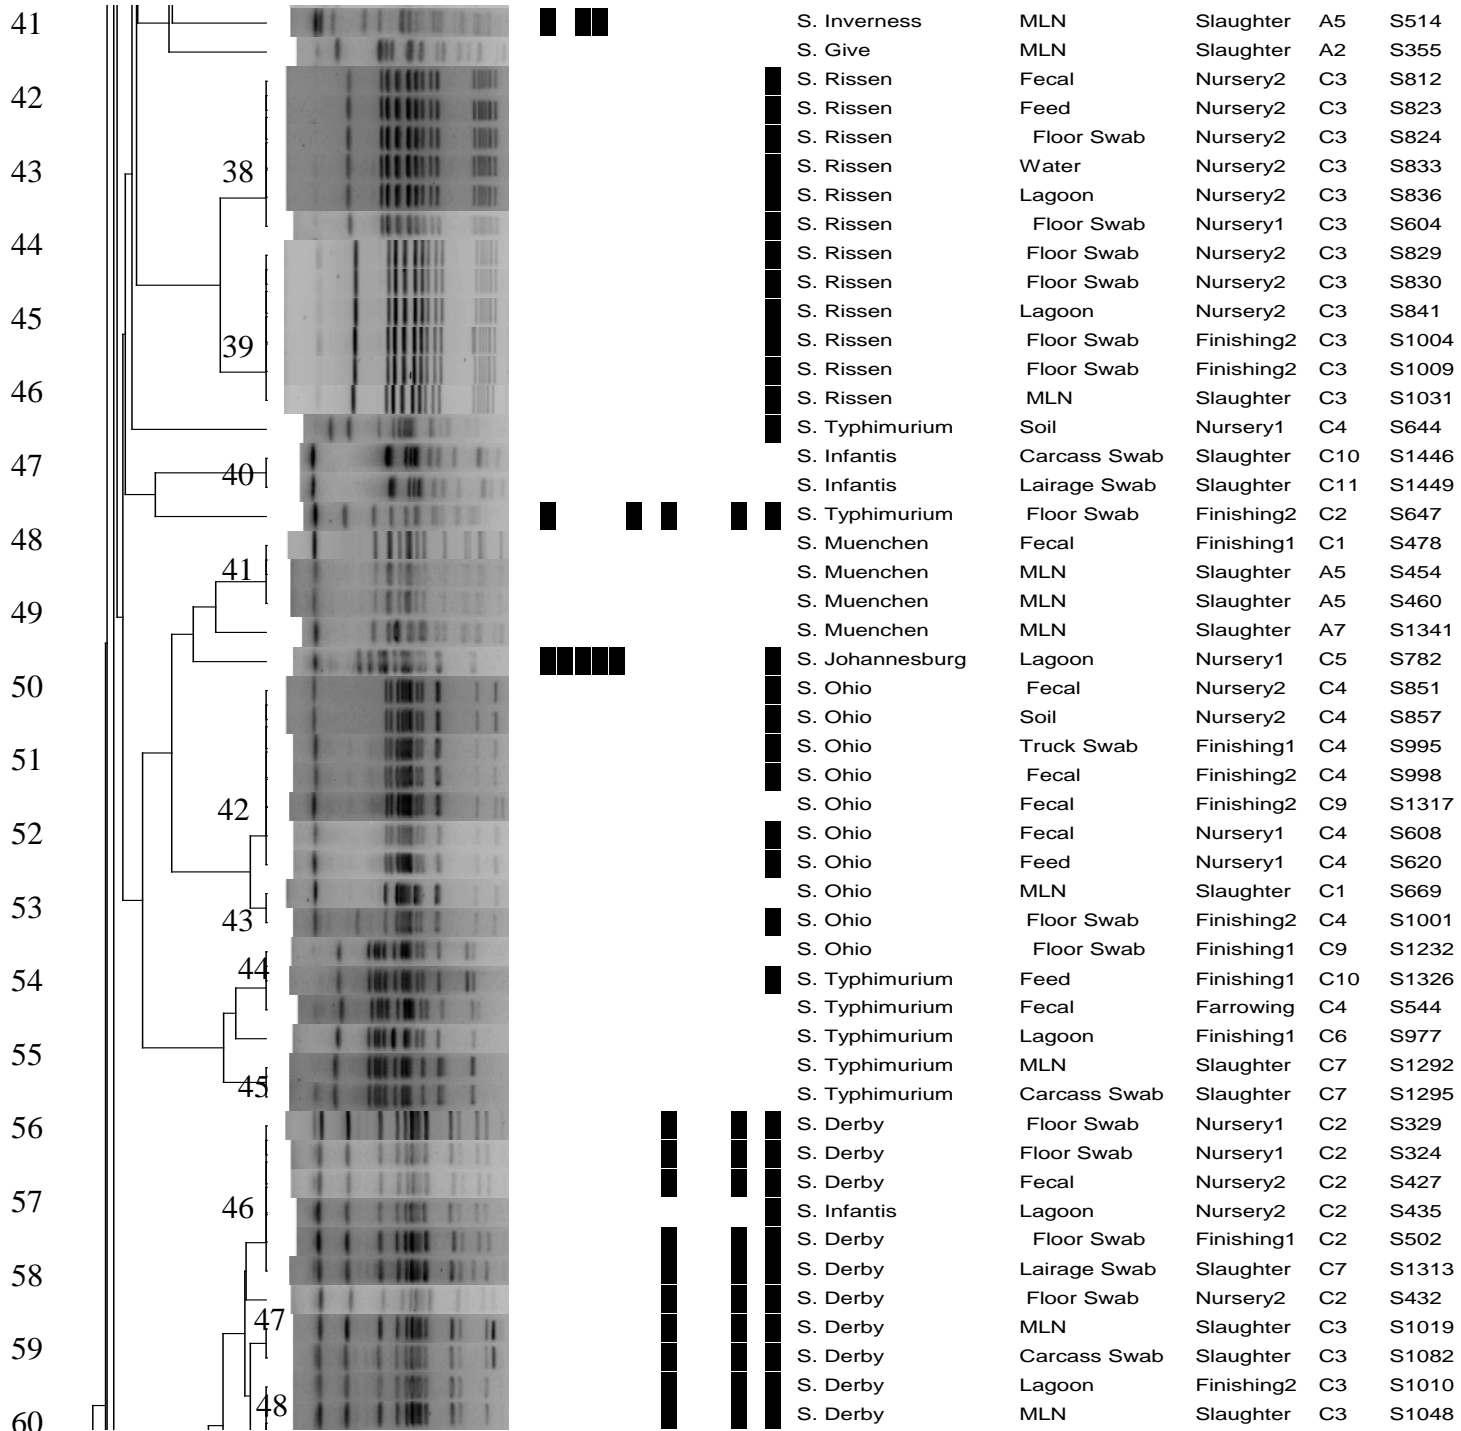

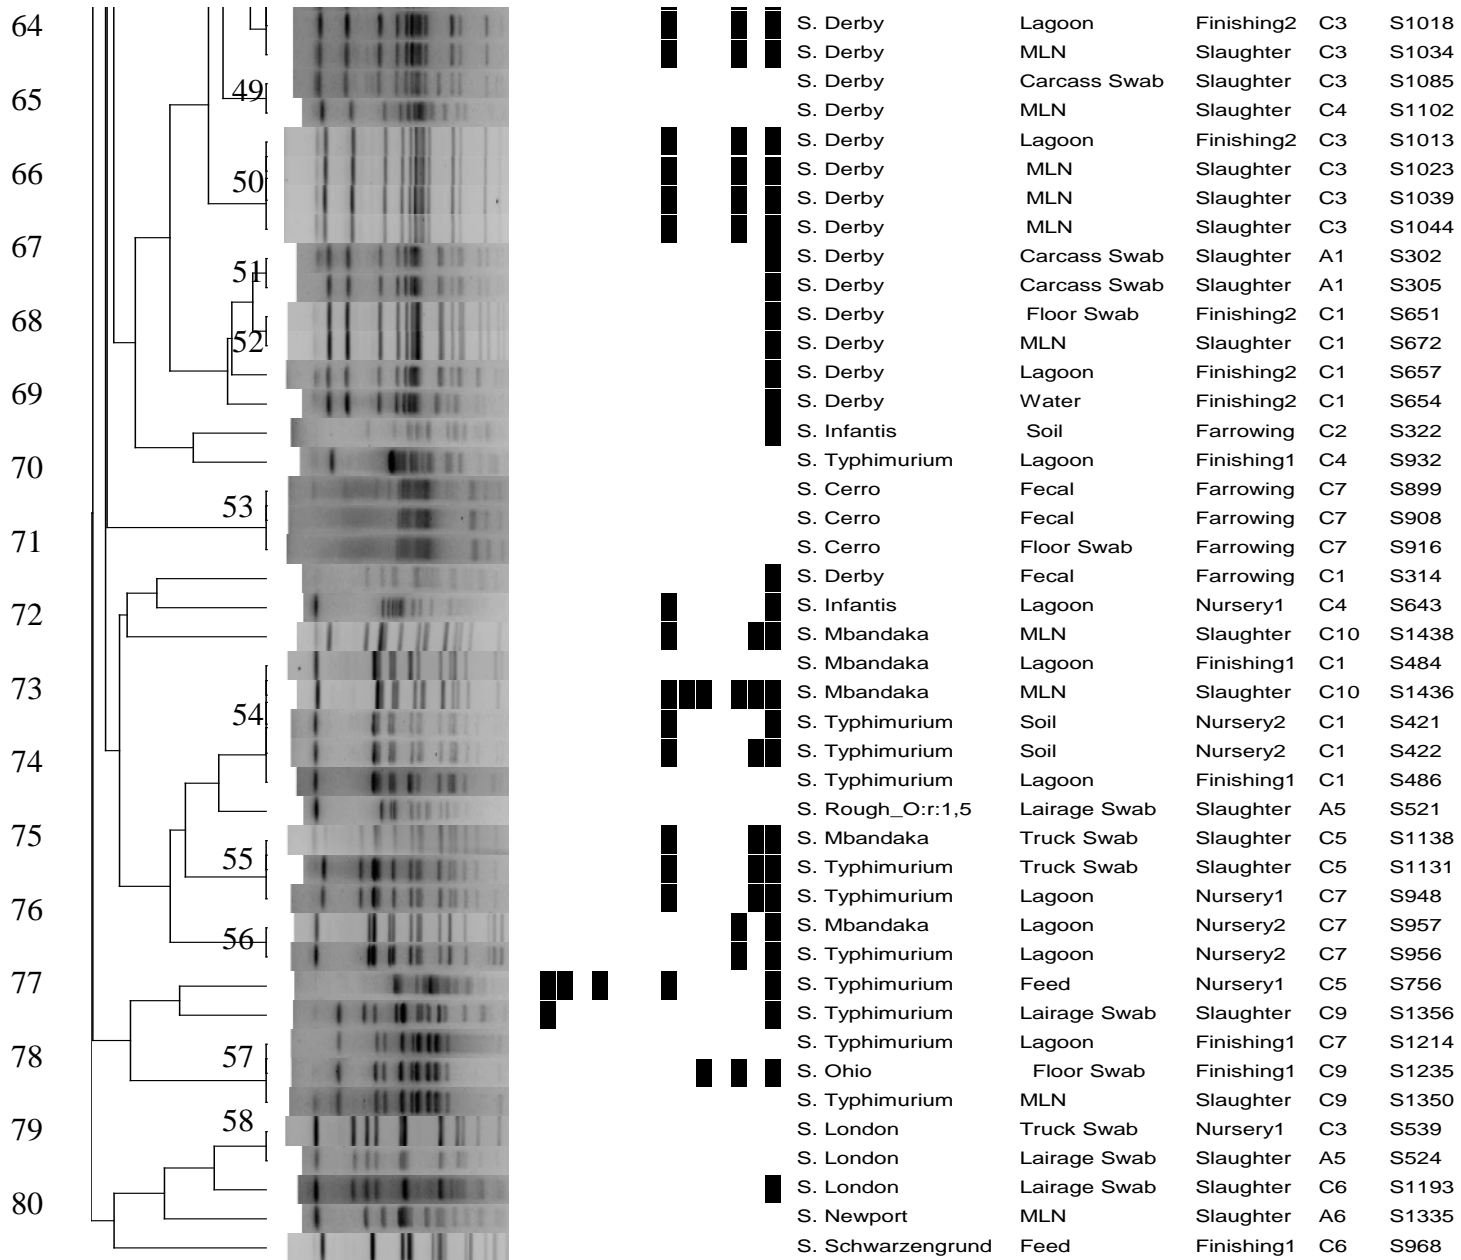

81

82

83

84

85

86

87

88

89 <sup>a</sup>AMI: Amikacin, AMP: Ampicillin, AUG: Amoxicillin/Clavulanic Acid, AXO:

90 Ceftriaxone, CHL: Chloramphenicol, CIP: Ciprofloxacin, FIS: Sulfisoxazole, FOX:

91 Cefoxitin, GEN: Gentamicin, KAN: Kanamycin, NAL: Nalidixic acid, STR:

92 Streptomycin, SXT: Trimethoprim/sulfamethaxazole, TET: Tetracycline, TIO: Ceftiofur.

93 <sup>b</sup>MLN: Mesenteric lymphnode

94 <sup>c</sup>A1-A8: ABF cohorts from 1 to 8

95 C1-C10: Conventional cohorts

96
